# Supplementary material
Source: ML conference proceedings conference paper supplement (https://openaccess.thecvf.com/content/WACV2024/html/Atanyan_Continuous_Adaptation_for_WACV_2024_paper.html)
Supplement: Supplementary file 1 [file Atanyan_Continuous_Adaptation_for_WACV_2024_supplemental.pdf]

# Supplementary Material for Continuous Adaptation for Interactive Segmentation Using Teacher-Student Architecture

Barsegh Atanyan<sup>1</sup>, Levon Khachatryan<sup>1</sup>, Shant Navasardyan<sup>1</sup>, Yunchao Wei<sup>2</sup>, Humphrey Shi<sup>1,3</sup>

<sup>1</sup>Picsart AI Research (PAIR), <sup>2</sup>BJTU, <sup>3</sup>Georgia Tech

<https://github.com/Picsart-AI-Research/Interactive-Segmentation-with-Continuous-Adapation>

## 1. Implementation Details

We have conducted our experiments with FocalClick SegFormerB3-S2 [3, 9] as the off-the-shelf pre-trained interactive segmentation model. To update student model parameters, we have used Adam optimizer with  $\beta_1 = 0.9$ ,  $\beta_2 = 0.999$ , batch size 1 and learning rate  $5 \times 10^{-5}$  (for DRIONS-DB [1] and DAVIS [5] learning rate is  $10^{-4}$  and  $10^{-5}$  correspondingly). We set  $\gamma = 2$  in both  $L_C$  and  $L_I$ . In case of continual adaptation a new optimizer is used for each new dataset  $D_l$ . We set  $\alpha = 0.999$  for exponential moving average (EMA) updates of the teacher model parameters. Also, during the adaptation on each dataset  $D_l$  parameter change regularizer  $L_R$  uses the teacher model parameters obtained after adapting on dataset  $D_{l-1}$  as initial parameters.

To verify that the proposed approach does not depend on the off-the-shelf pre-trained interactive segmentation model and deteriorates catastrophic forgetting we use RITM [7] with HRNet-18 backbone [2]. The student model is updated using Adam optimizer with  $\beta_1 = 0.9$ ,  $\beta_2 = 0.999$ , batch size 1 and learning rate  $5 \times 10^{-6}$  (for DRIONS-DB [1] and DAVIS [5] learning rate is  $10^{-5}$  and  $10^{-6}$  correspondingly). The teacher update rule is the same.

We use a GeForce RTX 2080 for our experiments.

## 2. More Qualitative Results

More qualitative results are provided to demonstrate the effectiveness of the proposed method to tackle catastrophic forgetting in continual adaptation. Figures 1 and 2 compare adaptation results of the baseline and our methods to show that it takes fewer click to achieve a higher IOU from our method. Figures 3, 4, 5 and 6 demonstrate the effectiveness of the proposed method for adaptation on new datasets comparing with SOTA interactive segmentation method FocalClick [3].

## References

- [1] Enrique J Carmona, Mariano Rincón, Julián García-Feijoó, and José M Martínez-de-la Casa. Identification of the optic nerve head with genetic algorithms. *Artificial intelligence in medicine*, 43(3):243–259, 2008. 1, 2, 3
- [2] Liang-Chieh Chen, Yukun Zhu, George Papandreou, Florian Schroff, and Hartwig Adam. Encoder-decoder with atrous separable convolution for semantic image segmentation. In *Proceedings of the European conference on computer vision (ECCV)*, pages 801–818, 2018. 1
- [3] Xi Chen, Zhiyan Zhao, Yilei Zhang, Manni Duan, Donglian Qi, and Hengshuang Zhao. Focalclick: towards practical interactive image segmentation. In *Proceedings of the IEEE/CVF Conference on Computer Vision and Pattern Recognition*, pages 1300–1309, 2022. 1, 4, 5, 6, 7
- [4] David Martin, Charless Fowlkes, Doron Tal, and Jitendra Malik. A database of human segmented natural images and its application to evaluating segmentation algorithms and measuring ecological statistics. In *Proceedings Eighth IEEE International Conference on Computer Vision. ICCV 2001*, volume 2, pages 416–423. IEEE, 2001. 3
- [5] Federico Perazzi, Jordi Pont-Tuset, Brian McWilliams, Luc Van Gool, Markus Gross, and Alexander Sorkine-Hornung. A benchmark dataset and evaluation methodology for video object segmentation. In *Proceedings of the IEEE conference on computer vision and pattern recognition*, pages 724–732, 2016. 1
- [6] Carsten Rother, Vladimir Kolmogorov, and Andrew Blake. ”grabcut” interactive foreground extraction using iterated graph cuts. *ACM transactions on graphics (TOG)*, 23(3):309–314, 2004. 2
- [7] Konstantin Sofiiuk, Ilya A Petrov, and Anton Konushin. Reviving iterative training with mask guidance for interactive segmentation. In *2022 IEEE International Conference on Image Processing (ICIP)*, pages 3141–3145. IEEE, 2022. 1
- [8] Xiaolu Sun, C Mario Christoudias, and Pascal Fua. Free-shape polygonal object localization. In *Computer Vision—ECCV 2014: 13th European Conference, Zurich, Switzerland, September 6–12, 2014, Proceedings, Part VI 13*, pages 317–332. Springer, 2014. 2, 3
- [9] Enze Xie, Wenhai Wang, Zhiding Yu, Anima Anandkumar, Jose M Alvarez, and Ping Luo. Segformer: Simple and efficient design for semantic segmentation with transformers. *Advances in Neural Information Processing Systems*, 34:12077–12090, 2021. 1

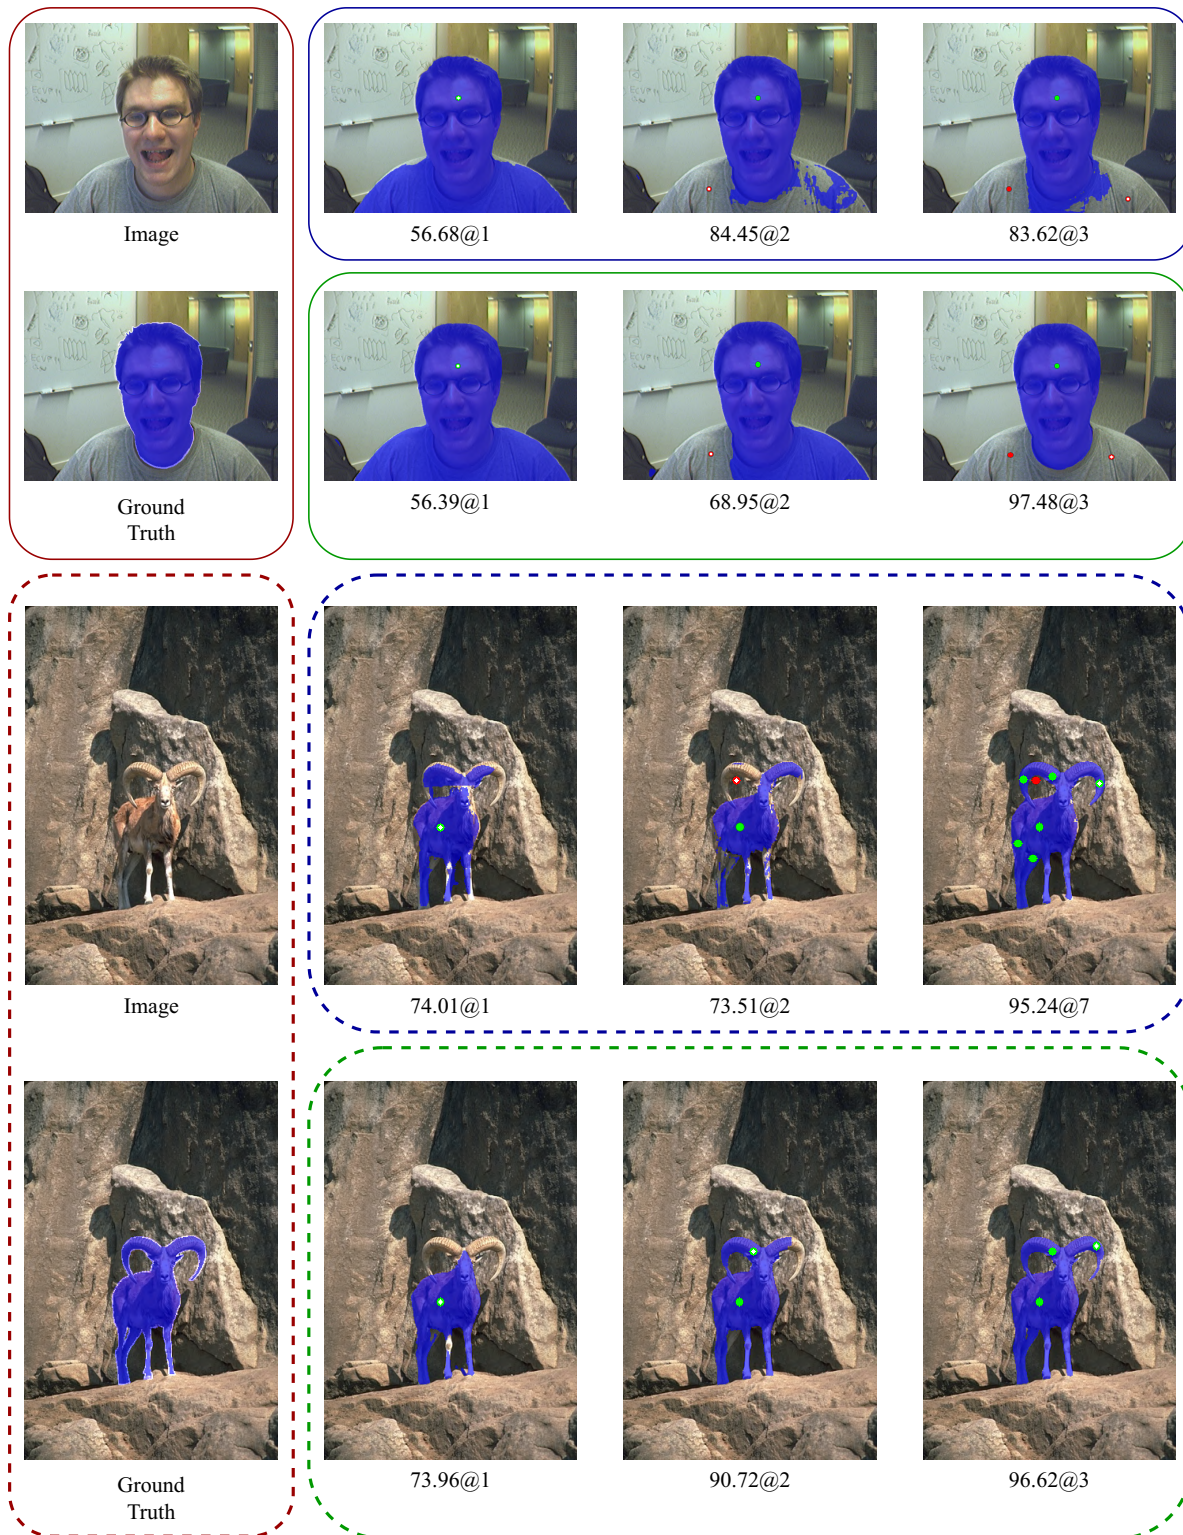

Figure 1. Comparison between the baseline and our method. Images are taken from *GrabCut* dataset. To illustrate the effectiveness of the proposed method to decrease catastrophic forgetting, the baseline and our method have been continuously adapted on DRIONS-DB [1] → Rooftop [8] → *GrabCut* [6]. Green and red points represent positive and negative clicks correspondingly. Blue horizontal boxes include results of the baseline method. Green horizontal boxes include results for the proposed teacher-student approach. IOU@Number of Clicks is reported. Red vertical boxes include the image and the ground truth.

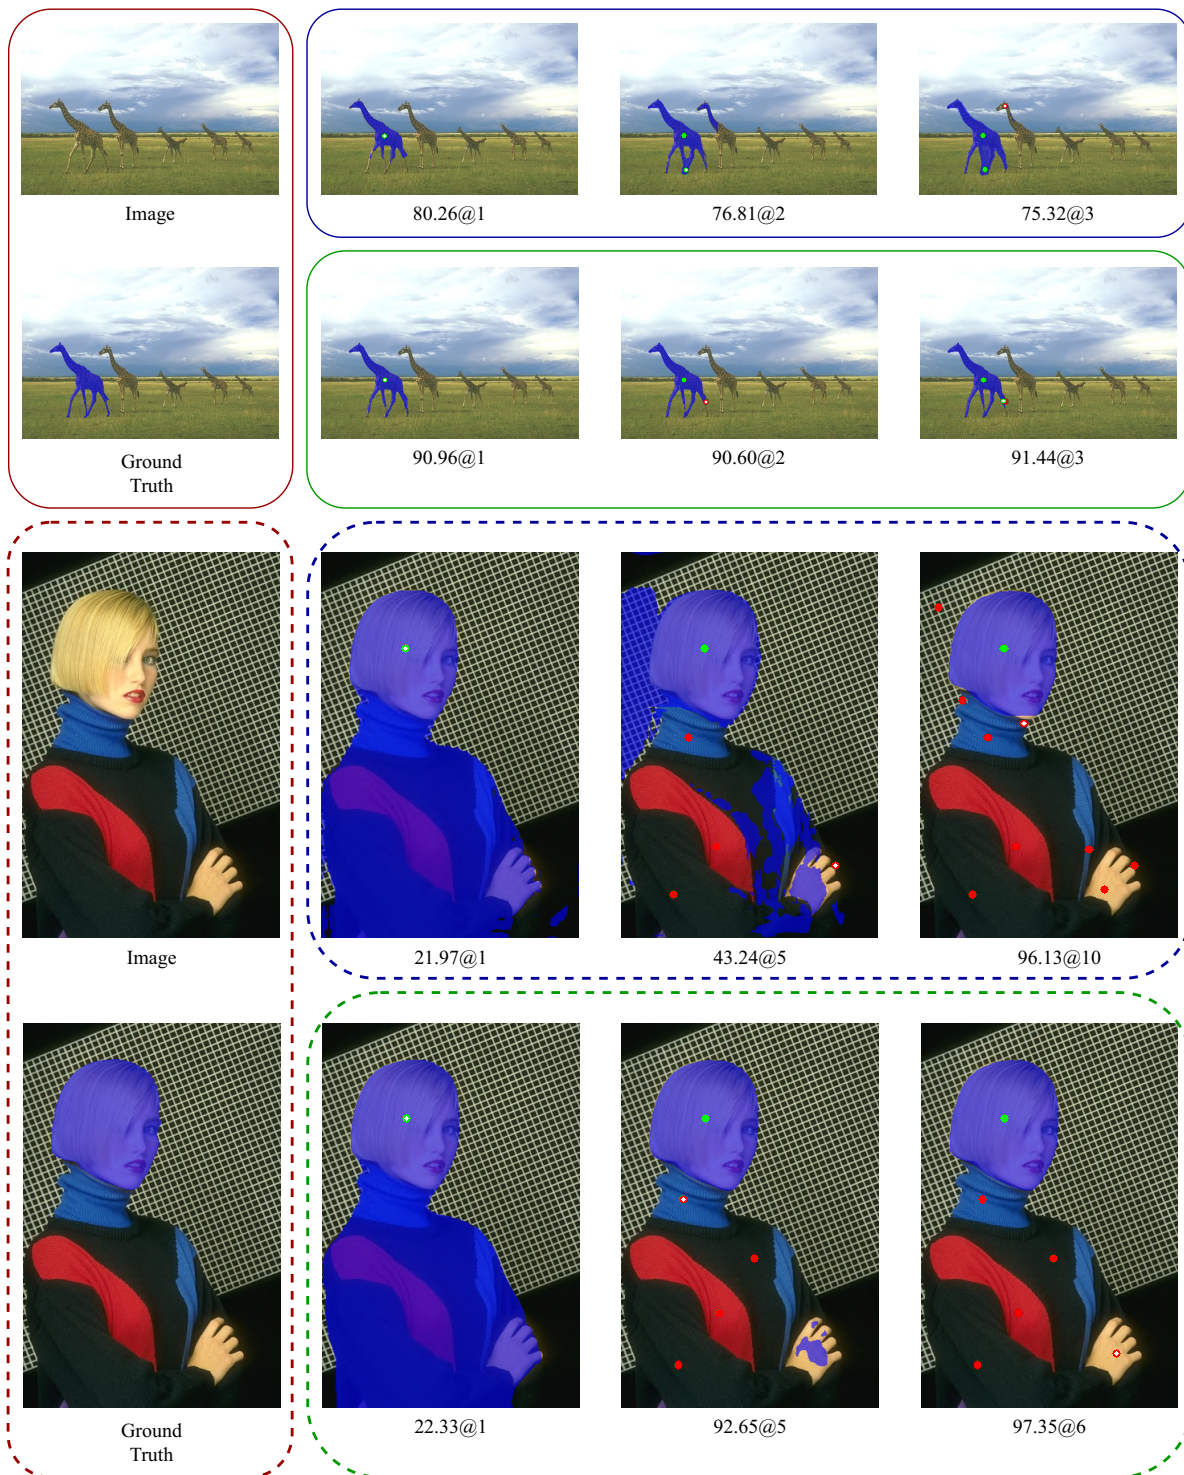

Figure 2. Comparison between the baseline and our method. Images are taken from *Berkeley* dataset. To illustrate the effectiveness of the proposed method to decrease catastrophic forgetting, the baseline and our method have been continuously adapted on DRIONS-DB [1] → Rooftop [8] → Berkeley [4]. Green and red points represent positive and negative clicks correspondingly. Blue horizontal boxes include results of the baseline method. Green horizontal boxes include results for the proposed teacher-student approach. IOU@Number of Click is reported. Red vertical boxes include the image and the ground truth.

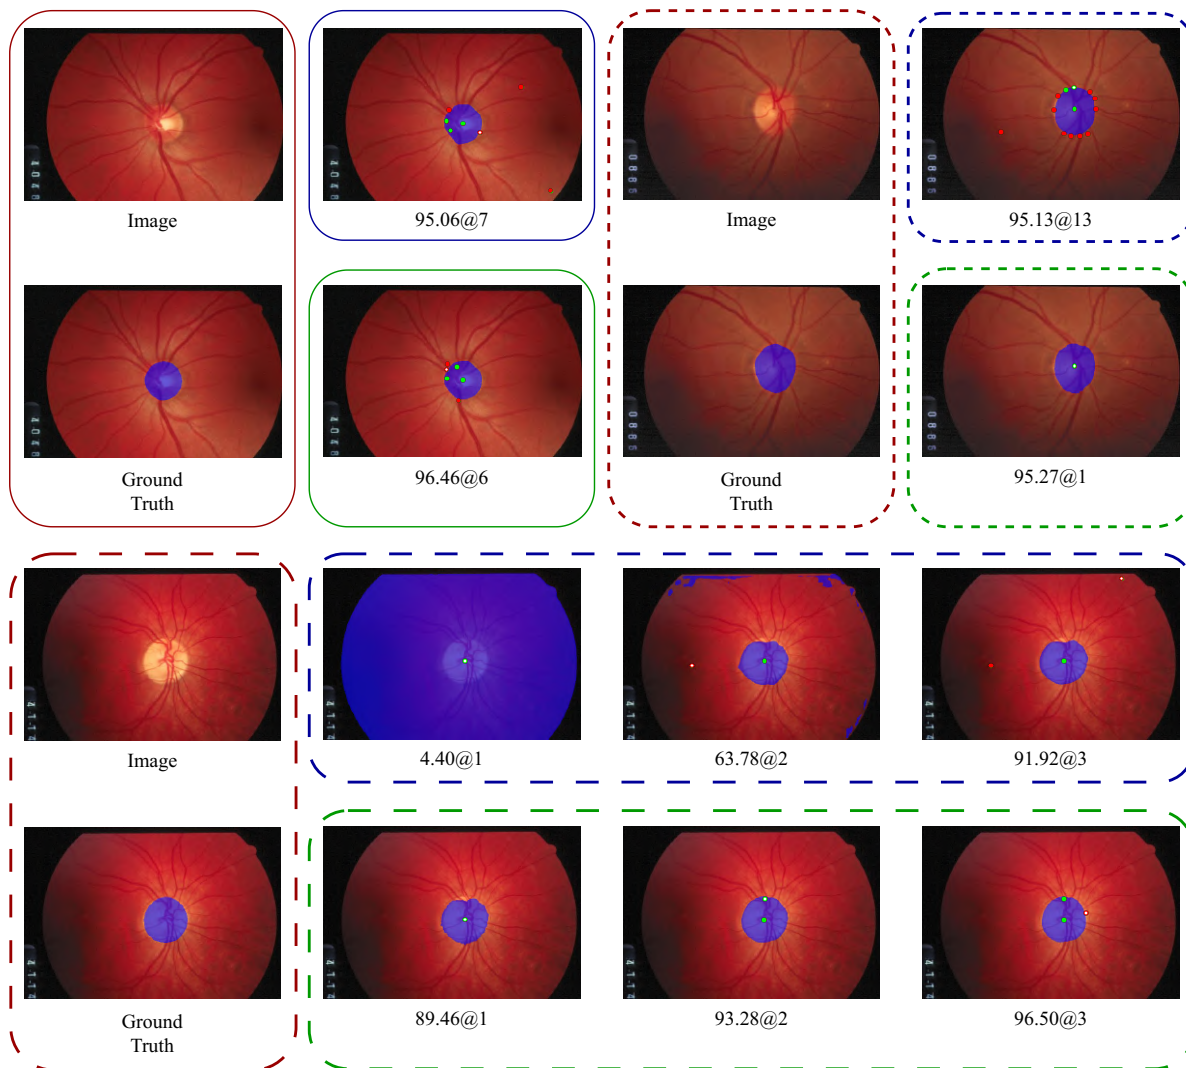

Figure 3. Comparison between FocalClick [3] and our method. Images are taken from *DRIONS – DB* dataset. Green and red points represent positive and negative clicks correspondingly. Blue horizontal boxes include results of FocalClick. Green horizontal boxes include results for the proposed teacher-student approach. IOU@Number of Click is reported. Red vertical boxes include the image and the ground truth.

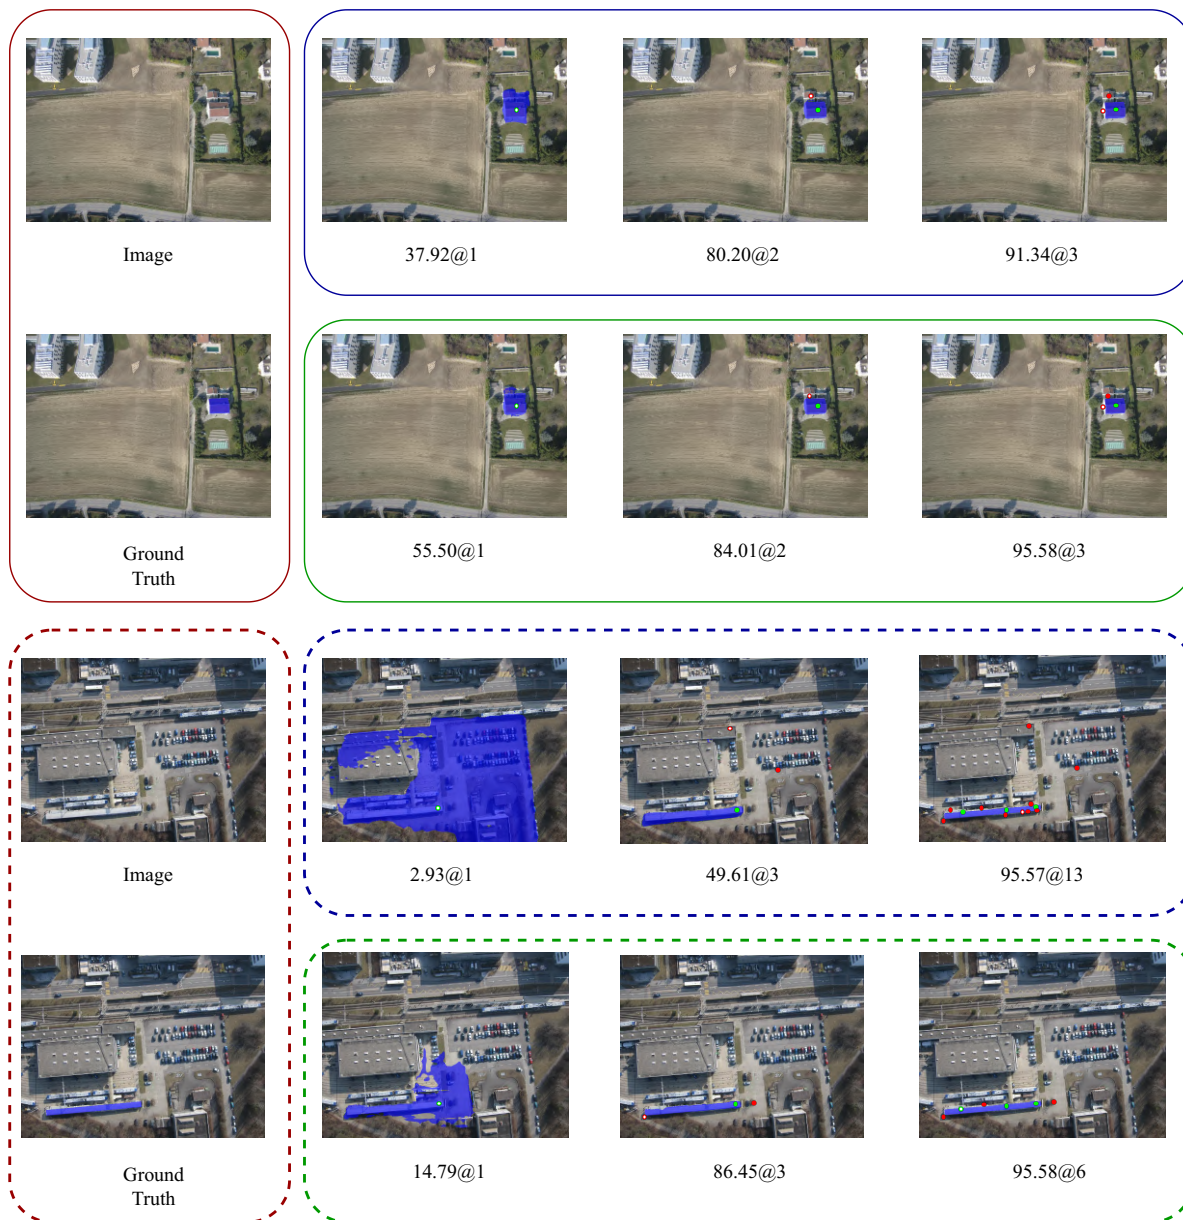

Figure 4. Comparison between FocalClick [3] and our method. Images are taken from *Rooftop* dataset. Green and red points represent positive and negative clicks correspondingly. Blue horizontal boxes include results of FocalClick. Green horizontal boxes include results for the proposed teacher-student approach. IOU@Number of Click is reported. Red vertical boxes include the image and the ground truth.

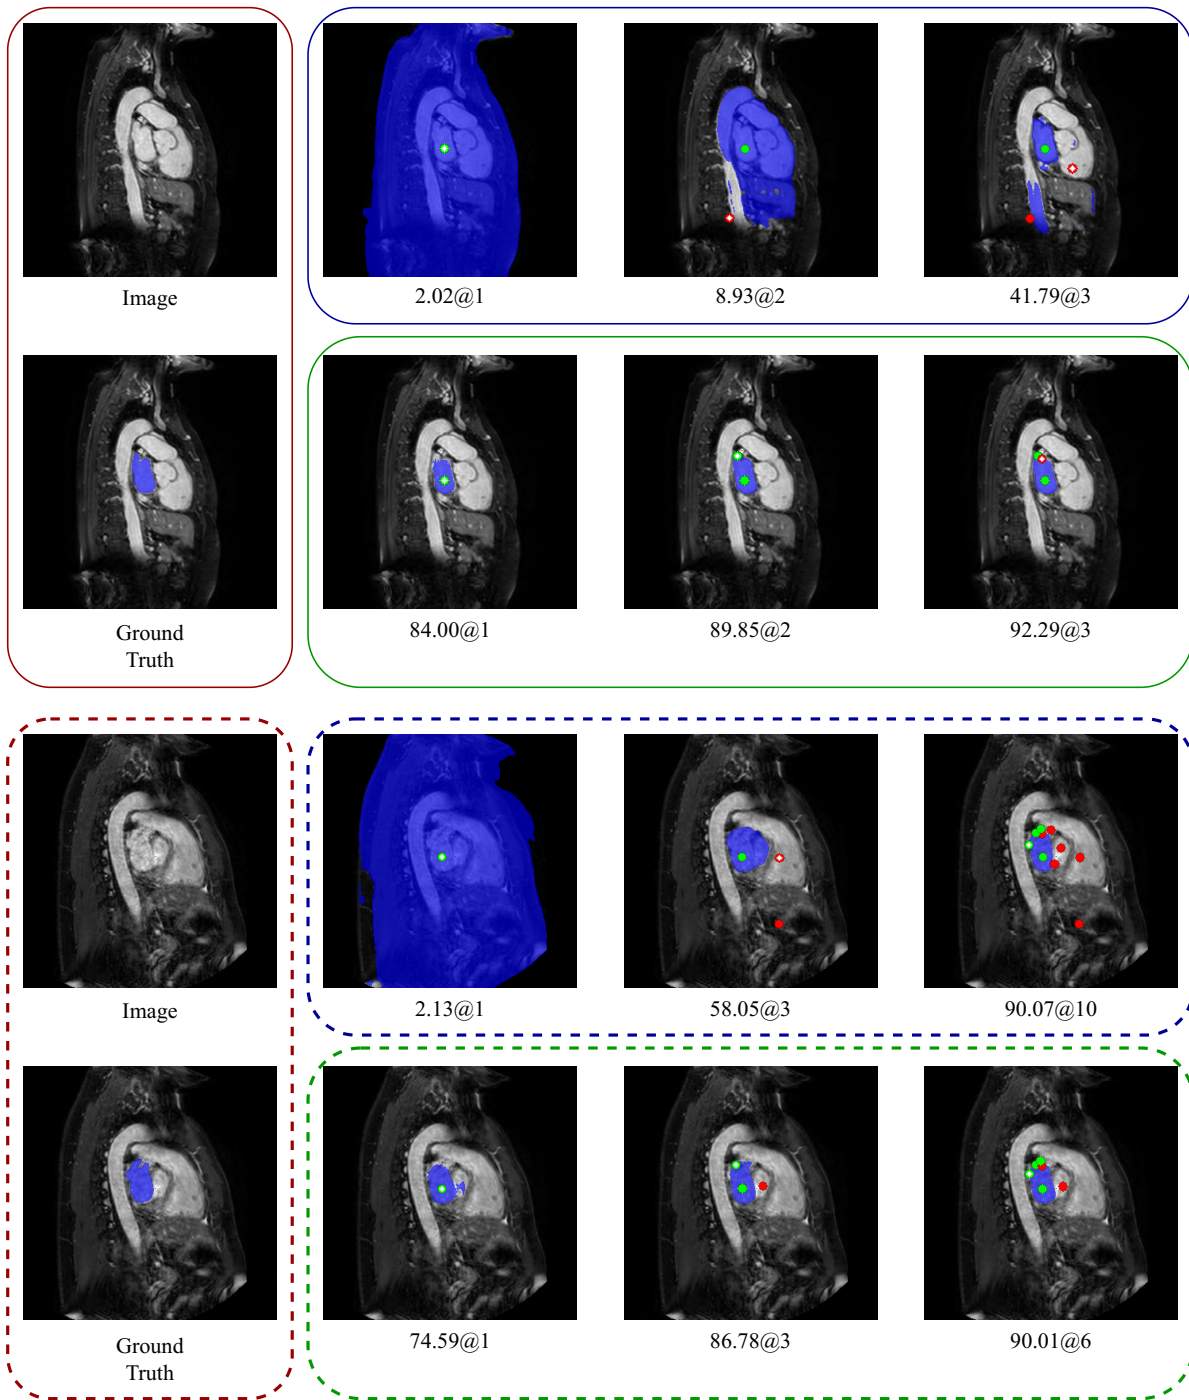

Figure 5. Comparison between FocalClick [3] and our method. Images are taken from *Heart* dataset. Green and red points represent positive and negative clicks correspondingly. Blue horizontal boxes include results of FocalClick. Green horizontal boxes include results for the proposed teacher-student approach. IOU@Number of Click is reported. Red vertical boxes include the image and the ground truth.

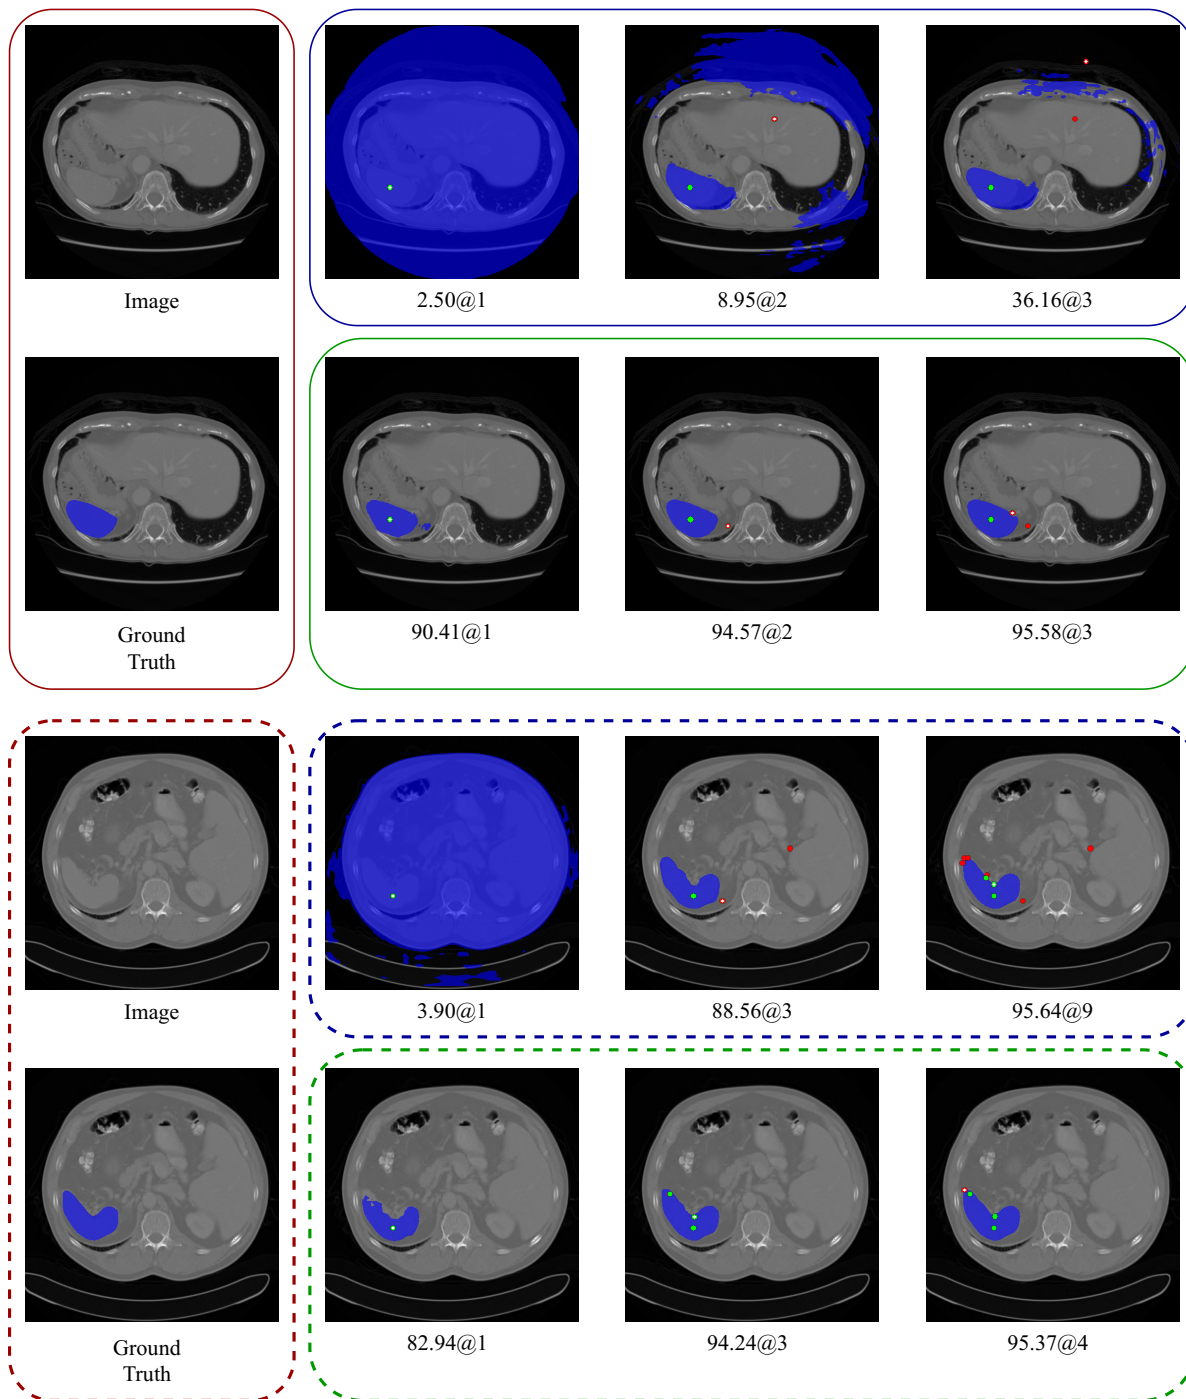

Figure 6. Comparison between FocalClick [3] and our method. Images are taken from *Spleen* dataset. Green and red points represent positive and negative clicks correspondingly. Blue horizontal boxes include results of FocalClick. Green horizontal boxes include results for the proposed teacher-student approach. IOU@Number of Click is reported. Red vertical boxes include the image and the ground truth.
